# Supplementary material
Source: PubMed Central journal article supplement (PMC9375707)
Supplement: EMS151232-supplement-Supplementary_data.pdf [file EMS151232-supplement-Supplementary_data.pdf]

## Supplementary data

Supplementary data are available at *European Heart Journal - Cardiovascular Imaging* online.
